# Supplementary material
Source: publisher site journal article supplement (https://www.dovepress.com/article/545378)
Supplement: Supplementary file 1 [file SUPPLEMENTARY%20MATERIALS%20corr.docx]

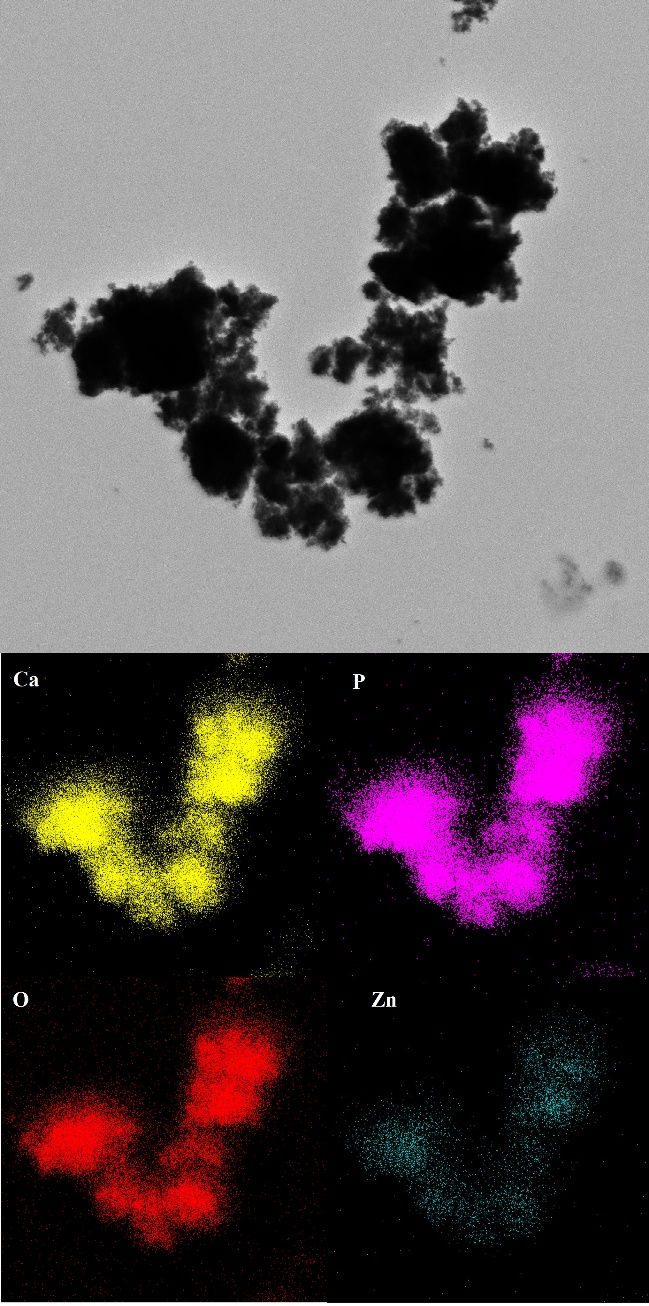
**Table 1s. Zn content (wt.%) in synthesized materials determined by EDS method**

|  | **Nominal Zn content (mol%)** | **Nominal Zn content (wt.%)** | **Experimental Zn content (wt.%)** | **Standard deviation**  **(wt.%)** | **%RSD** |
| --- | --- | --- | --- | --- | --- |
| **0.1ZnHA** | 0.1 | 0.65 | 0.59 | 0.13 | 22.03 |
| **0.4ZnHA** | 0.4 | 2.58 | 2.51 | 0.22 | 8.76 |
| **1.0ZnHA** | 1.0 | 6.35 | 6.77 | 0.71 | 10.49 |
| **1.8ZnHA** | 1.8 | 11.20 | 10,12 | 1.25 | 12.35 |

**Figure 1s. EDS characterization of the 0.6ZnHA sample showing elemental distribution. Main image represents STEM micrograph (2× enlarged) with elemental maps displaying spatial distribution of calcium (Ca), phosphorus (P), oxygen (O), and zinc (Zn).**





**Figure 2s. Curve fitting results for the 700-490 cm-1 region of the representative spectrum of the 06ZnHA sample.**

**Table 2s. Results of the curve fitting for the 700-490 cm-1 region with the assignments of the lines.**

| **line** | **wavenumber (cm-1)** | **% of the total (700-490 cm-1) area** | | | | | | | | | **Assignment[51, 52]** |
| --- | --- | --- | --- | --- | --- | --- | --- | --- | --- | --- | --- |
|  |  | **HA** | **0.1ZnHA** | **0.2ZnHA** | **0.4ZnHA** | **0.6ZnHA** | **0.8ZnHA** | **1.0ZnHA** | **1.4ZnHA** | **1.8ZnHA** |  |
| **1** | **628** | 17.1 | 13.5 | 14.7 | 15.3 | 14.9 | 13.8 | 12.8 | 10.7 | 10.1 | librational mode of structural OH groups |
| **2** | **615** | - | 4.8 | 4.7 | 7.3 | 8.1 | 6.9 | 7.6 | 9.8 | 11.7 | PO43- labile and poorly crystalline |
| **3** | **603** | 28.6 | 26.3 | 26.8 | 20.1 | 16.9 | 15.9 | 14.4 | 15.8 | 14.6 | regular apatitic PO43-  environment |
| **4** | **582** | - | 2.8 | 3.6 | 3.5 | 5.9 | 5.5 | 5.9 | 6.5 | 6.7 | terminal  PO43- groups on the crystal surface |
| **5** | **575** | 16.9 | 17.7 | 15.8 | 13.2 | 13.9 | 13.4 | 13.5 | 13.5 | 14.5 | regular apatitic PO43-  environment |
| **6** | **565** | 35.2 | 28.8 | 26.6 | 28.4 | 28.0 | 28.1 | 27.2 | 23.9 | 25.8 | regular apatitic PO43-  environment |
| **7** | **538** | 2.2 | 6.1 | 7.8 | 12.2 | 12.4 | 16.6 | 18.4 | 19.8 | 16.6 | P-OH groups (non-apatitic) |





**Figure 3s. Curve fitting results for the 1250-900 cm-1 region of the representative spectrum of the 06ZnHA sample.**

**Table 3s. Results of the curve fitting for the 1250-900 cm-1 region with the assignments of the lines.**

| **line** | **wavenumber (cm-1)** | **% of the fitted area** | | | | | | | | | **Assignment [61,51,52]** |
| --- | --- | --- | --- | --- | --- | --- | --- | --- | --- | --- | --- |
|  |  | **HA** | **0.1ZnHA** | **0.2ZnHA** | **0.4ZnHA** | **0.6ZnHA** | **0.8ZnHA** | **1.0ZnHA** | **1.4ZnHA** | **1.8ZnHA** |  |
| **1** | **1145** | 5.0 | 4.5 | 6.5 | 8.1 | 16.7 | 17.4 | 17.9 | 23.3 | 16.9 | HPO42- |
| **2** | **1110** | 14.6 | 18.6 | 18.7 | 16.7 | 10.4 | 8.9 | 18.1 | 11.1 | 14.5 | poorly crystalline apatite |
| **3** | **1097** | 7.7 | 9.3 | 10.4 | 13.9 | 7.9 | 10.6 | 6.1 | 13.1 | 14.9 | PO43- labile and poorly crystalline |
| **4** | **1060** | 18.9 | 19.1 | 20.5 | 22.5 | 22.0 | 18.9 | 13.2 | 11.4 | 10.5 | poorly crystalline  apatite PO43-  environment |
| **5** | **1030** | 32.4 | 26.5 | 25.1 | 23.9 | 20.2 | 20.2 | 23.6 | 18.9 | 19.2 | regular apatitic PO43-  environment |
| **6** | **1002** | 16.6 | 17.3 | 13.2 | 10.7 | 19.0 | 18.3 | 12.8 | 14.7 | 16.5 | regular apatitic PO43-  environment |
| **7** | **961** | 4.8 | 4.7 | 5.6 | 3.9 | 3.8 | 5.7 | 8.3 | 7.5 | 7.5 | υ1 PO43- |

**Table 4s. Peak fitting results and assignments for the 1H BD ssNMR spectra [51,57,58].**

| **line** | **ppm** | **assignments** |
| --- | --- | --- |
| 1 | 7.06 | P-OH groups |
| 2 | 5.41 | surface adsorber water |
| 3 | 0.52 | disordered OH groups in *c*-channels |
| 4 | 0.01 | well-ordered structural OH groups |





**Figure 4s. Curve fitting results for the 1H BD ssNMR spectrum of the 06ZnHA sample.**







**Figure 5s. Curve fitting results for the 31P BD (left) and 31P CP (right) ssNMR spectra of the 06ZnHA sample.**

**Table 5s. Results of the curve fitting for 31P (BD and CP) NMR experiments.**

| **line** | **ppm** | **% of the signal area** | | | | | | | | | **Assignment [55,56]** |
| --- | --- | --- | --- | --- | --- | --- | --- | --- | --- | --- | --- |
|  |  | **HA** | **0.1ZnHA** | **0.2ZnHA** | **0.4ZnHA** | **0.6ZnHA** | **0.8ZnHA** | **1.0ZnHA** | **1.4ZnHA** | **1.8ZnHA** |  |
| **BD** | | | | | | | | | | | |
| **narrow component** | **3.1** | 94.8 | 85.3 | 66.7 | 55.4 | 53.2 | 47.5 | 44.3 | 19.3 | 4.9 | 31P nuclei from crystalline core |
| **broad component** | **3.8** | 5.2 | 14.7 | 33.3 | 44.6 | 46.8 | 52.5 | 55.7 | 80.7 | 95.1 | 31P nuclei from hydrated Surface layer |
| **CP** | | | | | | | | | | | |
| **narrow component** | **3.1** | 57.2 | 55.9 | 49.4 | 42.3 | 18.9 | 18.7 | 29.1 | 4.5 | 0.9 | 31P nuclei from crystalline core |
| **broad component** | **3.9** | 42.8 | 44.1 | 50.6 | 57.7 | 81.1 | 81.3 | 70.9 | 95.5 | 99.1 | 31P nuclei from hydrated Surface layer |
